# Supplementary material
Source: PubMed Central journal article supplement (PMC9641618)
Supplement: NIHMS1840822-supplement-Appendix.pdf [file NIHMS1840822-supplement-Appendix.pdf]

# THE LANCET HIV

## Supplementary appendix 2

This appendix formed part of the original submission and has been peer reviewed. We post it as supplied by the authors.

Supplement to: de Sampaio Morais GA, Magno L, Silva AF, et al. Effect of a conditional cash transfer programme on AIDS incidence, hospitalisations, and mortality in Brazil: a longitudinal ecological study. *Lancet HIV* 2022; **9**: e690–99.

**Appendix table 1: Classification of histologies of lung cancer**

| <b>Histology</b>                           | <b>ICD-O-3 codes</b>                                                                                                                                                                                                                                                         |
|--------------------------------------------|------------------------------------------------------------------------------------------------------------------------------------------------------------------------------------------------------------------------------------------------------------------------------|
| SCC (squamous cell carcinoma)              | 8051-2,8070-6, 8078, 8083-4, 8090, 8094, 8120, 8123                                                                                                                                                                                                                          |
| Adeno (adenocarcinoma)                     | 8015,8050, 8140-1, 8143-5, 8147, 8190, 8201, 8211, 8250-5,8260, 8290, 8310, 8320, 8323, 8333, 8401, 8440, 8470-1, 8480-1, 8490, 8503, 8507, 8550, 8570-2, 8574, 8576                                                                                                         |
| Small (small cell carcinoma)               | 8002, 8041-5                                                                                                                                                                                                                                                                 |
| Large (large cell carcinoma)               | 8012-4, 8021, 8034, 8082                                                                                                                                                                                                                                                     |
| Other histologies included in lung cancers | carcinoma not otherwise specified (NOS) (8010); bronchioloalveolar carcinoma (8253), adenosquamous carcinoma (8560); giant cell and spindle cell carcinoma (8031); carcinoid tumor NOS (8240); sarcoma NOS (8800/3); solid carcinoma NOS (8230); spindle cell sarcoma (8801) |

**Appendix table 2. Average annual percentage change (AAPC) of lung cancer in PLWH in the United States in 2001-2016 stratified by age group.**

| <b>Age group (years)</b> | <b>AAPC (95% confidence interval)</b> |
|--------------------------|---------------------------------------|
| 20-39                    | -11% (-16%, -6%)                      |
| 40-49                    | -6% (-8%, -5%)                        |
| 50-59                    | -5% (-7%, -4%)                        |
| 60-69                    | -5% (-7%, -4%)                        |
| 70-89                    | -3% (-6%, 1%)                         |

**Appendix table 3. Measures of excess risk of lung cancer in people living with HIV compared to the general population in the United States in 2001-2016 according to HIV risk group and age group.**

| Risk group             | Year group | Observed | Expected | Person-years | SIR              | EAR (per 100,000 person-years) |
|------------------------|------------|----------|----------|--------------|------------------|--------------------------------|
| Female other / unknown | 2001-2004  | 103      | 30.62    | 144548.25    | 3.36 (2.75-4.08) | 50.07 (31.95-71.6)             |
|                        | 2005-2008  | 192      | 66.49    | 251947.19    | 2.89 (2.49-3.33) | 49.82 (35.34-66.23)            |
|                        | 2009-2012  | 231      | 114.3    | 353793.76    | 2.02 (1.77-2.3)  | 32.99 (21.62-45.73)            |
|                        | 2013-2016  | 87       | 56.42    | 172893.29    | 1.54 (1.24-1.9)  | 17.69 (3.86-34.37)             |
| Female PWID            | 2001-2004  | 88       | 14.47    | 63901.57     | 6.08 (4.88-7.49) | 115.07 (77.42-160.43)          |
|                        | 2005-2008  | 102      | 24.43    | 81726.03     | 4.18 (3.4-5.07)  | 94.91 (63.03-132.82)           |
|                        | 2009-2012  | 143      | 35.63    | 90845.36     | 4.01 (3.38-4.73) | 118.19 (83.83-157.94)          |
|                        | 2013-2016  | 53       | 16.2     | 37853.39     | 3.27 (2.45-4.28) | 97.22 (49.07-158.49)           |
| Male other / unknown   | 2001-2004  | 165      | 78.38    | 170789.61    | 2.11 (1.8-2.45)  | 50.72 (31-73.3)                |
|                        | 2005-2008  | 272      | 148.15   | 278085.31    | 1.84 (1.62-2.07) | 44.54 (28.79-62.04)            |
|                        | 2009-2012  | 344      | 224.83   | 383216.99    | 1.53 (1.37-1.7)  | 31.1 (18.18-45.28)             |
|                        | 2013-2016  | 158      | 104.78   | 182493.85    | 1.51 (1.28-1.76) | 29.16 (11.13-49.88)            |
| Male PWID              | 2001-2004  | 186      | 62.86    | 125451.1     | 2.96 (2.55-3.42) | 98.16 (69.56-130.65)           |
|                        | 2005-2008  | 211      | 97.38    | 161431.18    | 2.17 (1.88-2.48) | 70.38 (46.64-97.15)            |
|                        | 2009-2012  | 254      | 125.61   | 174802.24    | 2.02 (1.78-2.29) | 73.45 (49.28-100.41)           |
|                        | 2013-2016  | 84       | 48.51    | 73602.06     | 1.73 (1.38-2.14) | 48.22 (16.34-86.8)             |
| MSM                    | 2001-2004  | 115      | 80.92    | 238529.65    | 1.42 (1.17-1.71) | 14.29 (2.64-28)                |
|                        | 2005-2008  | 213      | 153.33   | 398583.87    | 1.39 (1.21-1.59) | 14.97 (5.3-25.86)              |
|                        | 2009-2012  | 269      | 239.07   | 581223.87    | 1.13 (0.99-1.27) | 5.15 (-2.34-13.48)             |
|                        | 2013-2016  | 156      | 137.86   | 344585.36    | 1.13 (0.96-1.32) | 5.26 (-4.22-16.17)             |
| Age group (years)      |            |          |          |              |                  |                                |
| 20-39                  | 2001-2004  | 37       | 7.16     | 284608.44    | 5.17 (3.64-7.12) | 10.48 (5.25-17.48)             |
|                        | 2005-2008  | 28       | 6.71     | 356772.12    | 4.17 (2.77-6.03) | 5.97 (2.41-10.93)              |
|                        | 2009-2012  | 22       | 6.26     | 425479.76    | 3.51 (2.2-5.32)  | 3.7 (1.11-7.48)                |
|                        | 2013-2016  | 5        | 3.18     | 235995.73    | 1.57 (0.51-3.67) | 0.77 (-1-4.78)                 |
| 40-49                  | 2001-2004  | 219      | 69.66    | 299320.75    | 3.14 (2.74-3.59) | 49.89 (36.83-64.58)            |
|                        | 2005-2008  | 269      | 96.83    | 474043.97    | 2.78 (2.46-3.13) | 36.32 (27.14-46.53)            |
|                        | 2009-2012  | 238      | 92.86    | 567402.77    | 2.56 (2.25-2.91) | 25.58 (18.38-33.64)            |
|                        | 2013-2016  | 56       | 27.84    | 237153.34    | 2.01 (1.52-2.61) | 11.87 (3.95-21.89)             |
| 50-59                  | 2001-2004  | 266      | 108.9    | 126514.71    | 2.44 (2.16-2.75) | 124.18 (89.96-162.24)          |
|                        | 2005-2008  | 427      | 208.6    | 263485.87    | 2.05 (1.86-2.25) | 82.89 (61.88-105.74)           |
|                        | 2009-2012  | 546      | 316.17   | 433146.06    | 1.73 (1.59-1.88) | 53.06 (38.55-68.69)            |
|                        | 2013-2016  | 246      | 153.25   | 238147.63    | 1.61 (1.41-1.82) | 38.95 (21.5-58.44)             |
| 60-69                  | 2001-2004  | 109      | 60.86    | 27180.7      | 1.79 (1.47-2.16) | 177.11 (77.77-294.53)          |
|                        | 2005-2008  | 209      | 131.25   | 64187.91     | 1.59 (1.38-1.82) | 121.13 (61.7-188.16)           |
|                        | 2009-2012  | 343      | 236.97   | 131154.48    | 1.45 (1.3-1.61)  | 80.84 (43.17-122.23)           |
|                        | 2013-2016  | 171      | 130.97   | 82998.23     | 1.31 (1.12-1.52) | 48.23 (6.88-95.47)             |
| 70-89                  | 2001-2004  | 26       | 20.67    | 5595.58      | 1.26 (0.82-1.84) | 95.25 (-121.99-402.54)         |
|                        | 2005-2008  | 57       | 46.4     | 13283.71     | 1.23 (0.93-1.59) | 79.8 (-63.03-259.98)           |
|                        | 2009-2012  | 92       | 87.18    | 26699.15     | 1.06 (0.85-1.29) | 18.05 (-74.25-128.81)          |
|                        | 2013-2016  | 60       | 48.53    | 17133.02     | 1.24 (0.94-1.59) | 66.95 (-46.98-209.81)          |

**Supplementary Figure 2. Bias factor analysis for the strength of confounding my smoking under the null hypothesis of no relative excess risk of lung cancer in people living with HIV (PLWH) compared to the general population stratified by age group under scenarios of prevalence of smoking in the general population (columns) and PLWH (rows).**

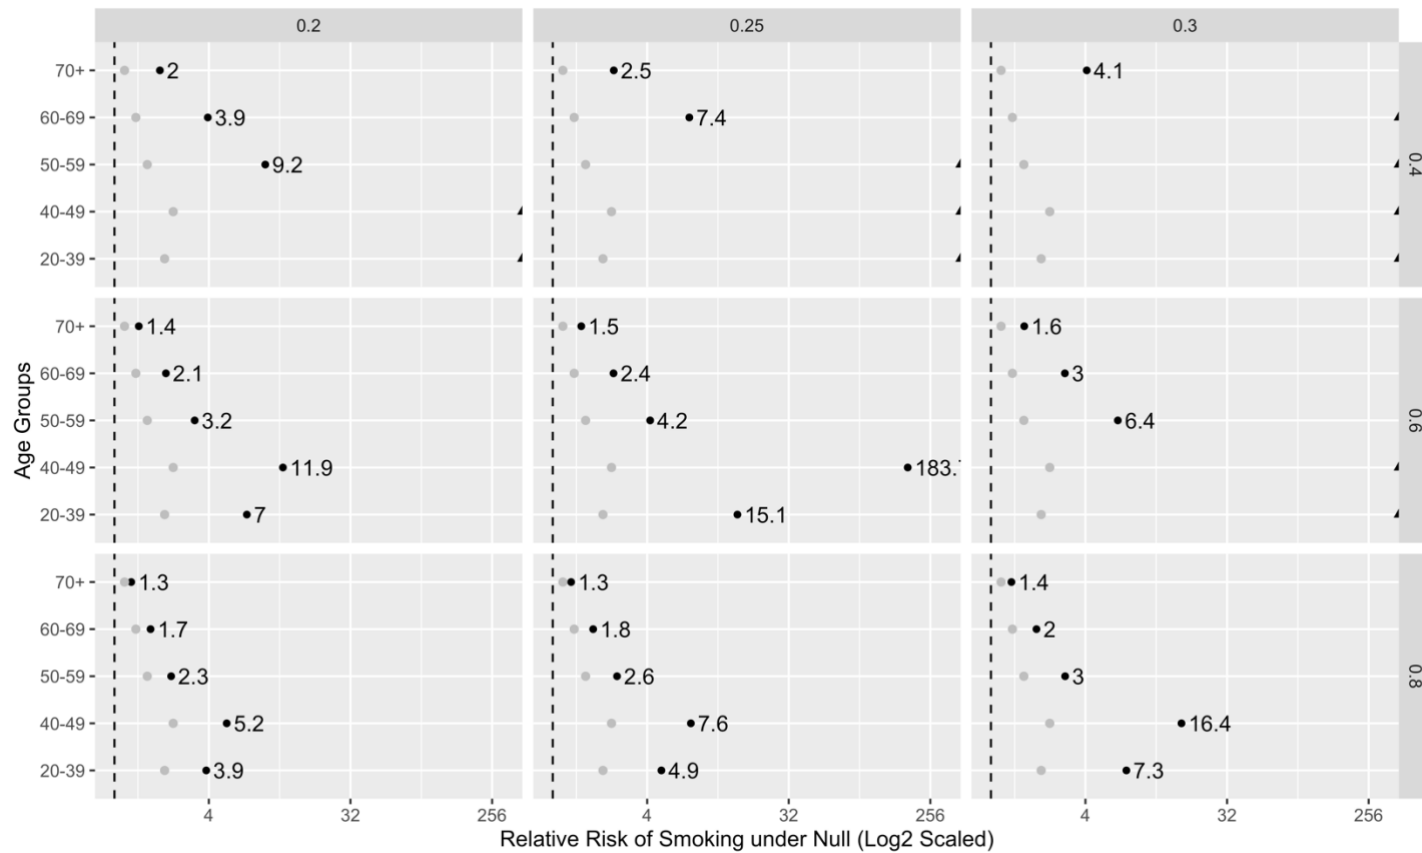

Grey dots are the observed SIR, dashed line is the null SIR (i.e. 1), black dots represent the strength of smoking on lung cancer risk under the null SIR.

**Appendix table 4. Within age group 5-year cumulative incidence of lung cancer, non-Hodgkin lymphoma, and Kaposi's sarcoma in people living with HIV at separate time of origins of 2001, 2006, and 2011.**

| Age group | Origin | Lung Cancer        | non-Hodgkin lymphoma | Kaposi's sarcoma   |
|-----------|--------|--------------------|----------------------|--------------------|
| 20-39     | 2001   | 0.06% (0.05-0.08%) | 0.67% (0.62-0.71%)   | 0.58% (0.54-0.62%) |
|           | 2006   | 0.04% (0.03-0.05%) | 0.63% (0.59-0.67%)   | 0.54% (0.50-0.58%) |
|           | 2011   | 0.02% (0.01-0.03%) | 0.45% (0.41-0.49%)   | 0.45% (0.41-0.49%) |
| 40-49     | 2001   | 0.38% (0.34-0.42%) | 0.96% (0.89-1.02%)   | 0.39% (0.35-0.43%) |
|           | 2006   | 0.32% (0.29-0.35%) | 0.74% (0.69-0.78%)   | 0.30% (0.27-0.33%) |
|           | 2011   | 0.22% (0.19-0.25%) | 0.59% (0.54-0.64%)   | 0.27% (0.24-0.30%) |
| 50-59     | 2001   | 1.00% (0.88-1.10%) | 1.07% (0.95-1.18%)   | 0.31% (0.24-0.37%) |
|           | 2006   | 0.83% (0.76-0.90%) | 0.73% (0.66-0.79%)   | 0.21% (0.18-0.24%) |
|           | 2011   | 0.62% (0.56-0.68%) | 0.56% (0.50-0.62%)   | 0.14% (0.11-0.17%) |
| 60-69     | 2001   | 1.87% (1.52-2.18%) | 1.31% (1.01-1.59%)   | 0.23% (0.11-0.35%) |
|           | 2006   | 1.55% (1.34-1.74%) | 0.71% (0.57-0.84%)   | 0.16% (0.09-0.22%) |
|           | 2011   | 1.36% (1.17-1.53%) | 0.45% (0.35-0.56%)   | 0.12% (0.06-0.17%) |
| 70-89     | 2001   | 1.93% (1.03-2.79%) | 0.86% (0.32-1.38%)   | 0.08% (0.00-0.25%) |
|           | 2006   | 1.58% (1.12-2.01%) | 0.93% (0.58-1.27%)   | 0.27% (0.08-0.46%) |
|           | 2011   | 1.65% (1.19-2.08%) | 0.62% (0.37-0.88%)   | 0.17% (0.02-0.32%) |
